# Supplementary material for: The presence of wild type p53 in hematological cancers improves the efficacy of combinational therapy targeting metabolism
Source: Oncotarget. 2015 Jul 30;6(22):19228–45. doi: 10.18632/oncotarget.4653 (PMC4662487; doi:10.18632/oncotarget.4653)
Supplement: Supplementary file 1 [file oncotarget-06-19228-s001.pdf]

## SUPPLEMENTARY MATERIALS AND METHODS

Sequence of the primers used for PCR analyses and catalogue numbers of the ONTARGET plus siRNAs (Dharmacon) used for AMPK $\alpha$  knockdown. A single siRNA complementary to the target was used for the experiments.

**Mdm2 forward** 5'-CGGACGCACGCCACTT-3'

**Mdm2 reverse** 5'-CAGTAGGTACAGACATGTTG GTATTGC -3'

**p21 forward** 5'-GGCGGCAGACCAGCATGACA GATT- 3'

**p21 reverse** 5'-GCAGGGGGCGGCCAGGGT-3'

**GLS2 forward** 5'- TGCCTATAGTGGCGATGTCT CA-3'

**GLS2 reverse** 5'-GTTCCATATCCATGGCTGA CAA-3'

**SCO2 forward** 5'-GCAGCCTGTCTTCATCACTG TGGACC-3'

**SCO2 reverse** 5'-CCGCACACTGTCTGAGAT CTGCTC-3'

**AMPK $\beta$  forward** 5'-CCTCACCAGAAGCCAC AATA-3'

**AMPK $\beta$  reverse** 5'-AGCTGGCTGGTTACTATG GG-3'

**PUMA forward** 5'-CCTGGAGGGTCCTGTACAA TCT-3'

**PUMA reverse** 5'-GCACCTAATTGGGCTCCA TCT-3'

**Actin forward** 5'-GAGGGAAATCGTGCGTGA CA-3'

**Actin reverse** 5'-AATAGTGATGACCTGGCC GT-3'

### siRNA

**AMPK $\alpha$  (1):** 007675-05

**AMPK $\alpha$  (2):** 007675-06

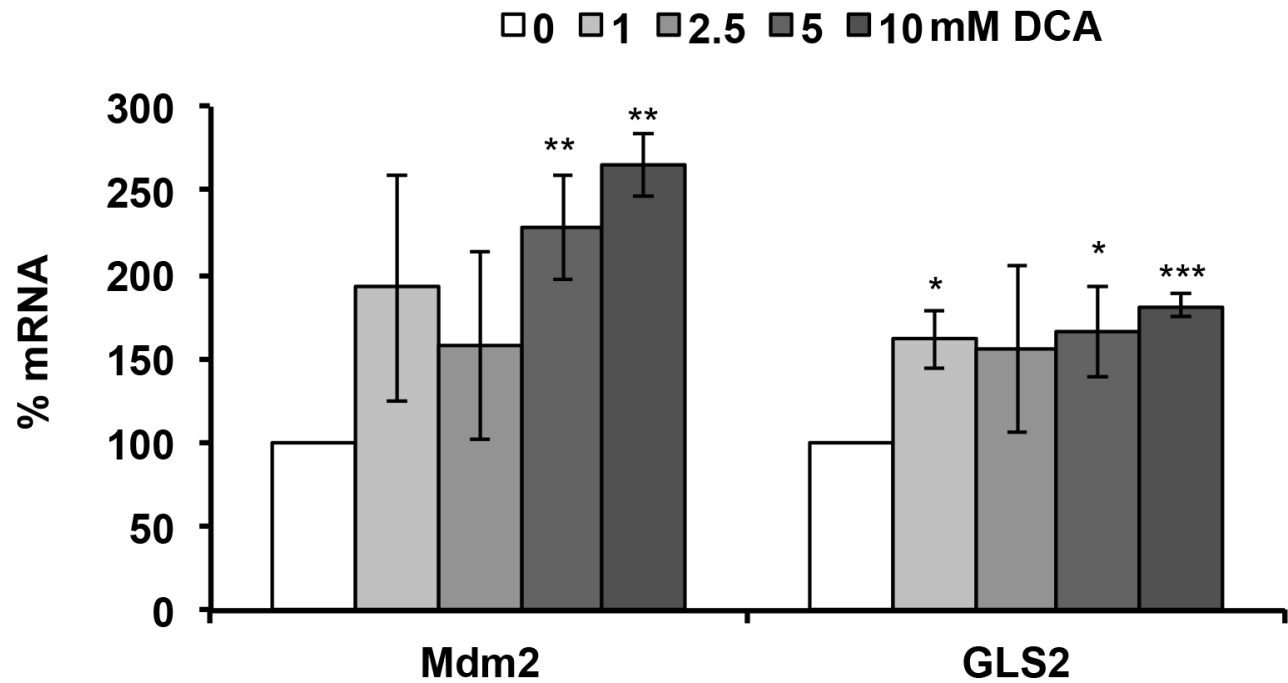

**Supplementary Figure S1: Related to Figure 1.** Low doses of DCA activates p53 transcription activity. MOLM13 cell line were treated with low concentration of DCA for 24 h. mRNA levels of Mdm2 and GLS2. Values are the mean  $\pm$  SD of two independent experiment \* $p < 0.05$ ; \*\* $p < 0.01$ ; \*\*\* $p < 0.001$ .

**A**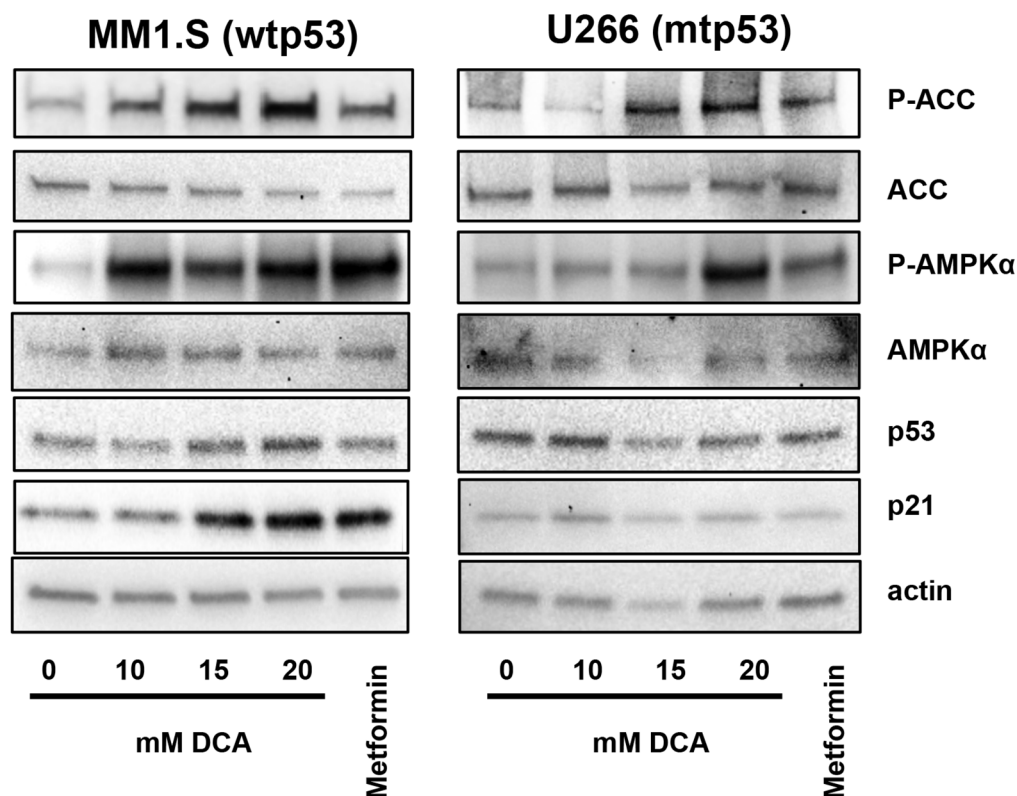**B**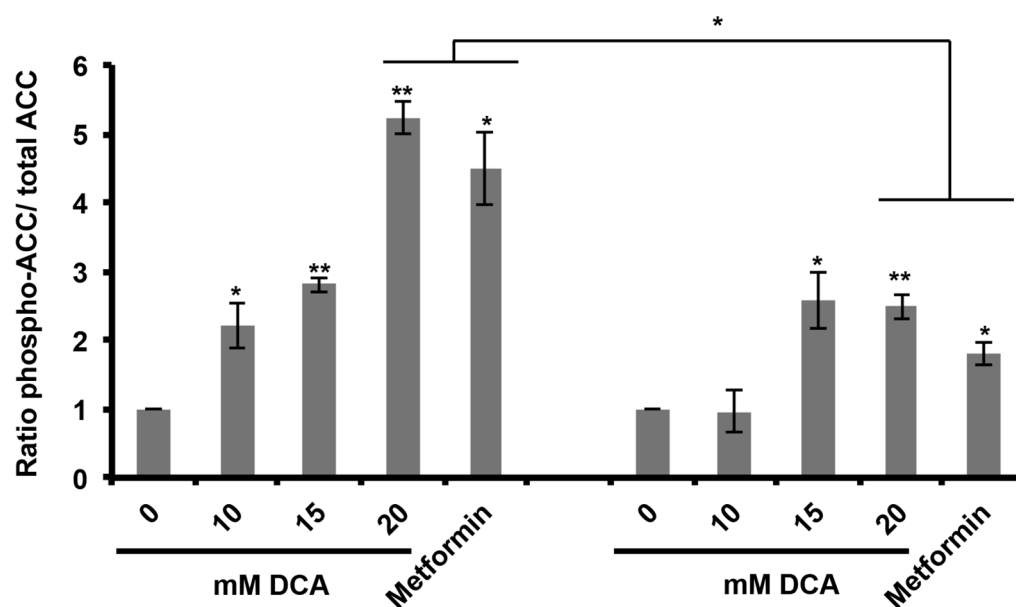

**Supplementary Figure S2: Related to Figure 2 and 3.** DCA induces the activation of the AMPK/p53 pathway. **A.** MM cells were incubated with the indicated concentrations of DCA for 24 hours. DCA increased the protein expression of P-AMPK, P-ACC, p53 and p21 in MM1.S cells that carry wild type p53 (wtp53). Phosphorylation of AMPK and ACC required higher doses of DCA in the U266 cell line (mutant p53, mtp53) and no increase of p53 and p21 protein levels was detected. **B.** Graph representing the ratio between phosphorylated ACC and total ACC protein levels. Bands were quantified using the Image lab software. Values are the mean  $\pm$  SD of two independent experiments.

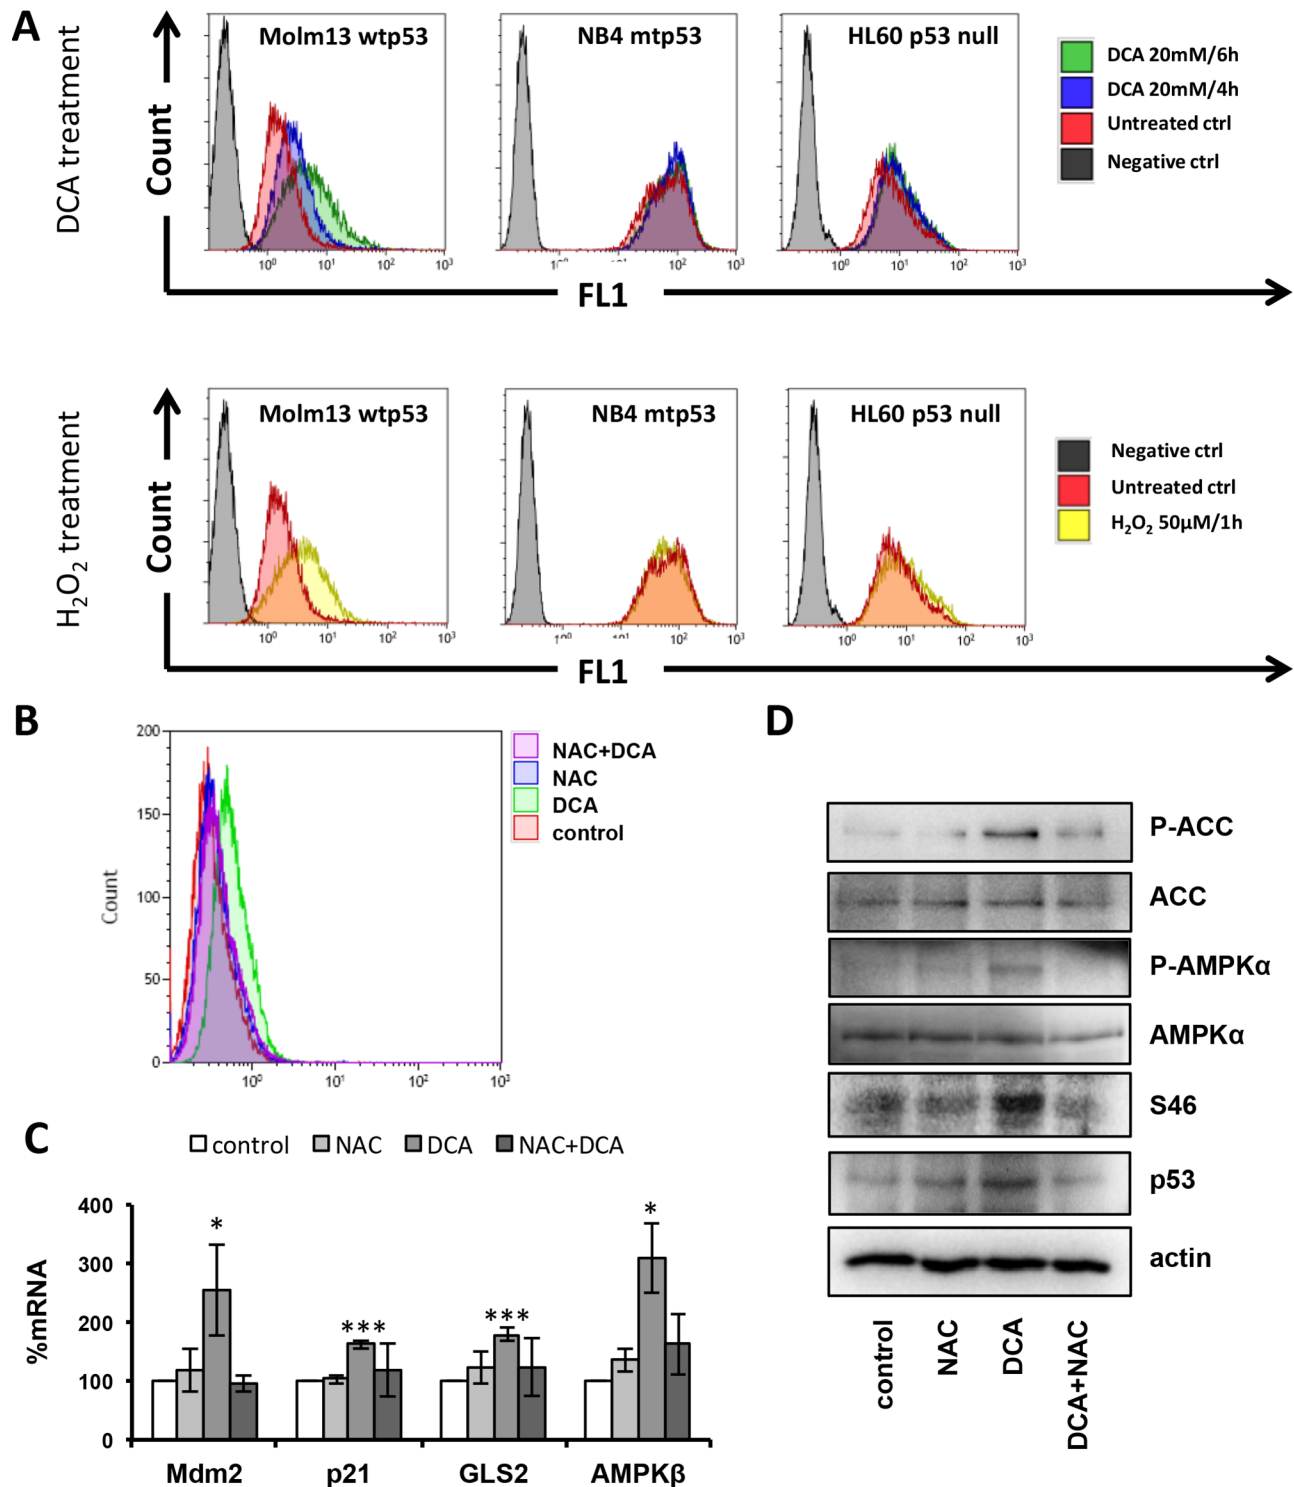

**Supplementary Figure S3: Related to Figure 1 and Figure 2.** **A.** Effect of DCA on ROS production in AML cells. AML cells were incubated with 20 mM DCA for 4 and 6 hours or with H<sub>2</sub>O<sub>2</sub> for 1 hour. For ROS detection, cells were incubated with 10 μM DCFH2-DA for 30 min before flow cytometry analysis. DCA and H<sub>2</sub>O<sub>2</sub> treatment increased ROS production in all AML cell lines, but ROS production was higher in MOLM13 cells (wtp53). **B.** AMPK/p53 activation was inhibited by blocking DCA-ROS production (CellROX<sup>®</sup> Reagent) using NAC (N-acetyl-L-cysteine). **C.** and **D.** 1mM NAC blocks DCA-induced ACC and p53 phosphorylation as well as Mdm2, p21, GLS2 and AMPKβ mRNA expression. Values are the mean ± SD of two independent experiments.

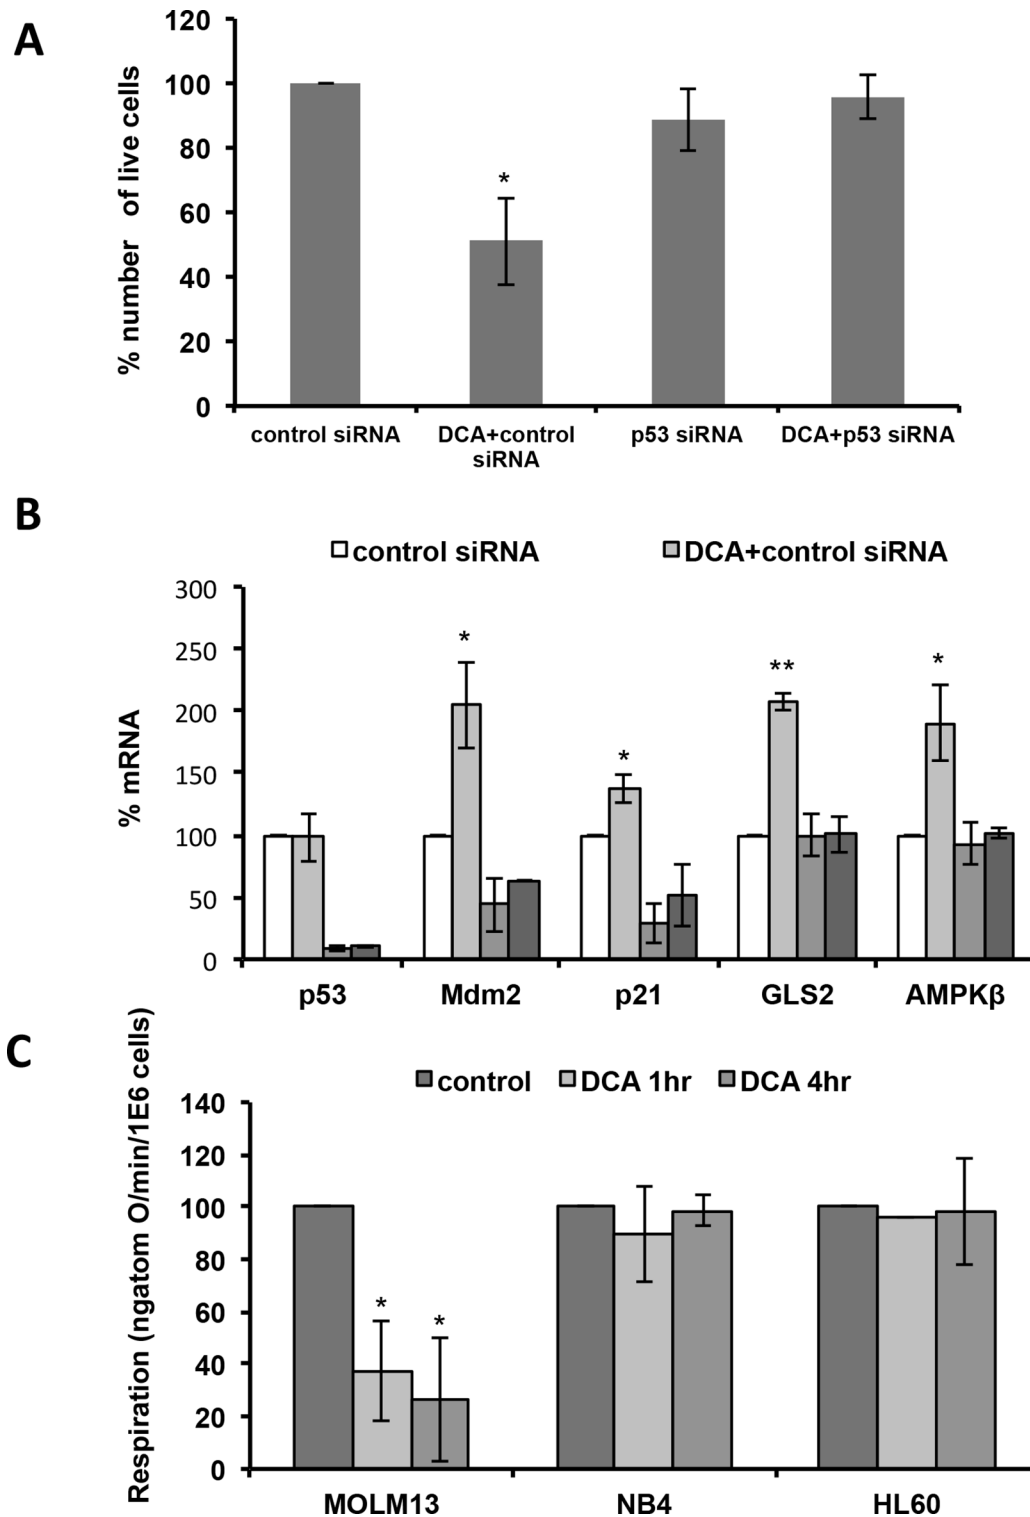

**Supplementary Figure S4: Related to Figure 3.** Knockdown of p53 abolishes the effect of DCA on cell proliferation and Mdm2, p21, GLS2 and AMPK $\beta$  mRNA expression in HCT116+/+ cell line. HCT116+/+ cells were transfected with 30 nM control or p53 siRNA. After 24 hr transfection, 10 mM DCA was added for another 24 hr. **A.** A reduction of alive cells was only observed in the cells transfected with control siRNA and treated with DCA. Number of cells were counted using the Muse™ Cell Analyzer. **B.** mRNA levels of the indicated genes were analysed by RT-qPCR. **C.** Effect of DCA on oxygen consumption in AML cell lines. A decrease oxygen consumption was observed in MOLM13 cell line (wt p53) after DCA treatment (10 mM) for 1 and 4 hours whereas there was not effect in NB4 and HL60 cells. Values are the mean  $\pm$  SD of two independent experiments \* $p < 0.05$ ; \*\* $p < 0.01$ ; \*\*\* $p < 0.001$ .

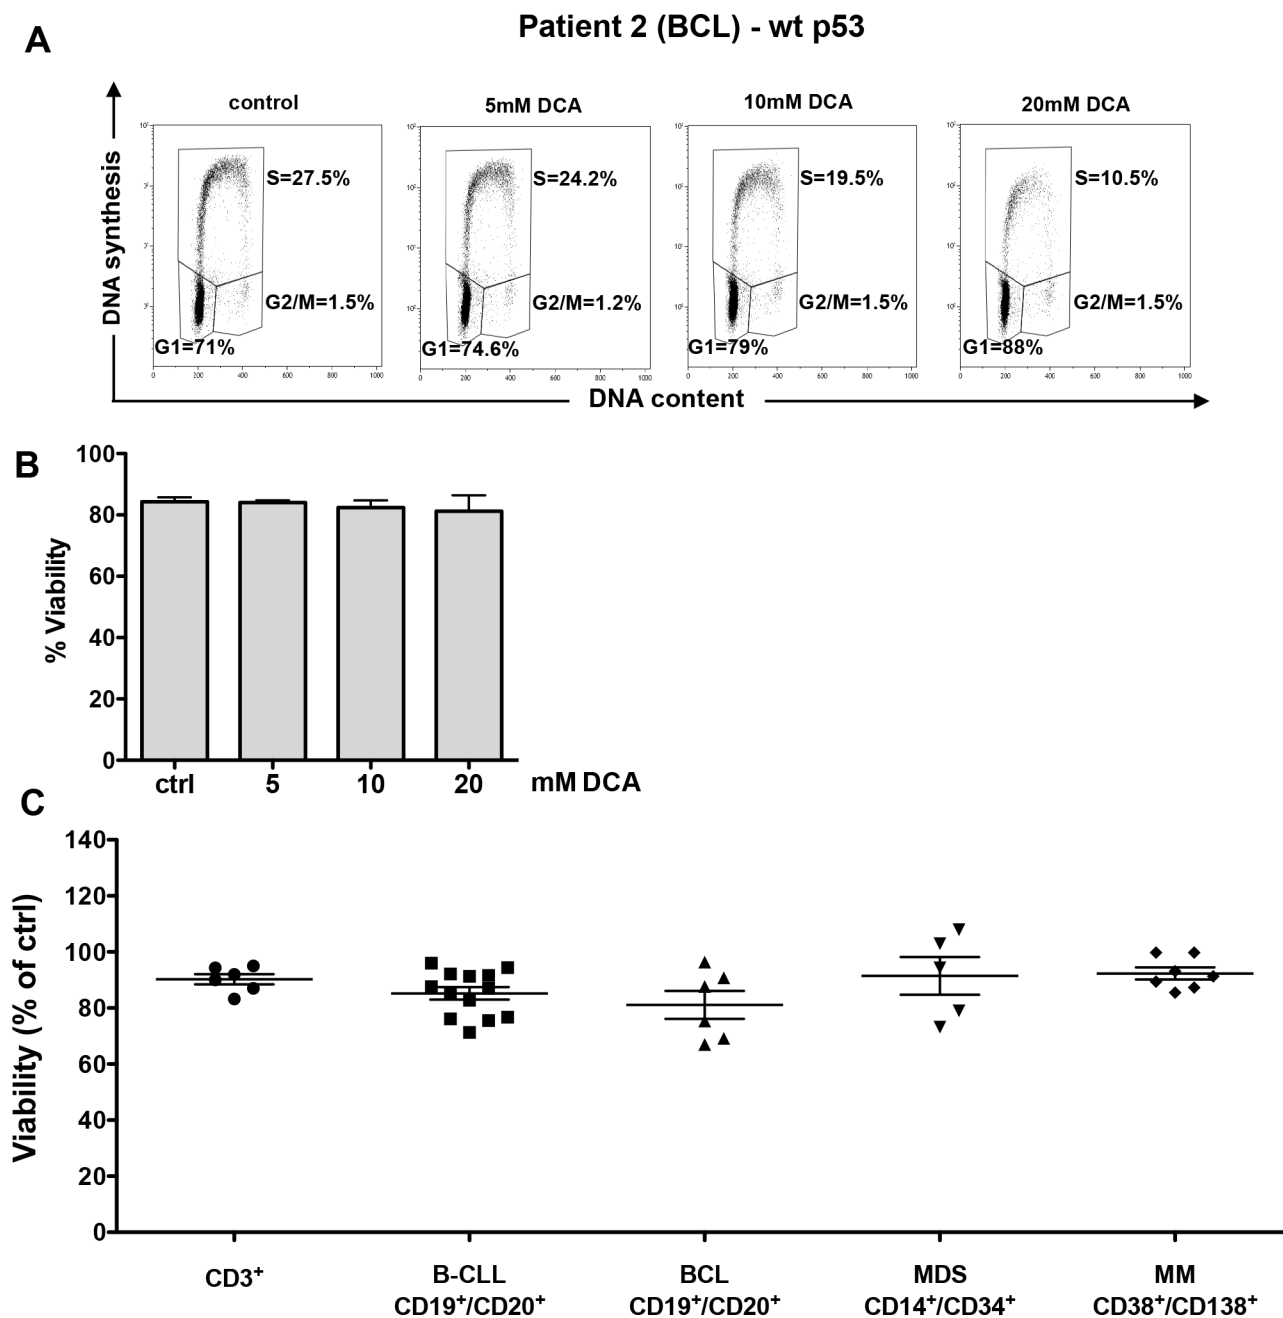

**Supplementary Figure S5: Related to Figure 1.** Effect of DCA on proliferation and viability of primary tumor cells. **A.** DCA causes G1 cell cycle arrest in primary tumor cells. Tumor cells obtained from Patient 2 (B-cell leukemia, BCL) were cultured in the presence of different concentrations of DCA for 48 h. Then, cells were pulse-labeled with EdU and harvested for cell cycle analysis. **B.** DCA does not affect viability of primary tumor cells. Patient 2 primary BCL cells were incubated with the indicated concentrations of DCA for 48 h. Cell viability was determined by 7-AAD staining and flow cytometry (values are the mean  $\pm$  SD of three independent experiments performed in triplicate). **C.** Primary tumor cells from 13 patients with B-cell chronic lymphocytic leukemia (B-CLL) (CD19<sup>+</sup>/CD20<sup>+</sup>), six patients with B-cell lymphoma (BCL, CD19<sup>+</sup>/CD20<sup>+</sup>), five patients with myelodysplasia (MDS, CD14<sup>+</sup>/CD34<sup>+</sup>) and seven patients with MM (CD14<sup>+</sup>/CD34<sup>+</sup>) (all wt p53) were treated with 10 mM DCA for 48 h before 7-AAD staining and analysis by flow cytometry. CD3<sup>+</sup> cells from healthy donors ( $n = 6$ ) were used as control. Values are the mean  $\pm$  SD of one experiment performed in triplicate.

**A**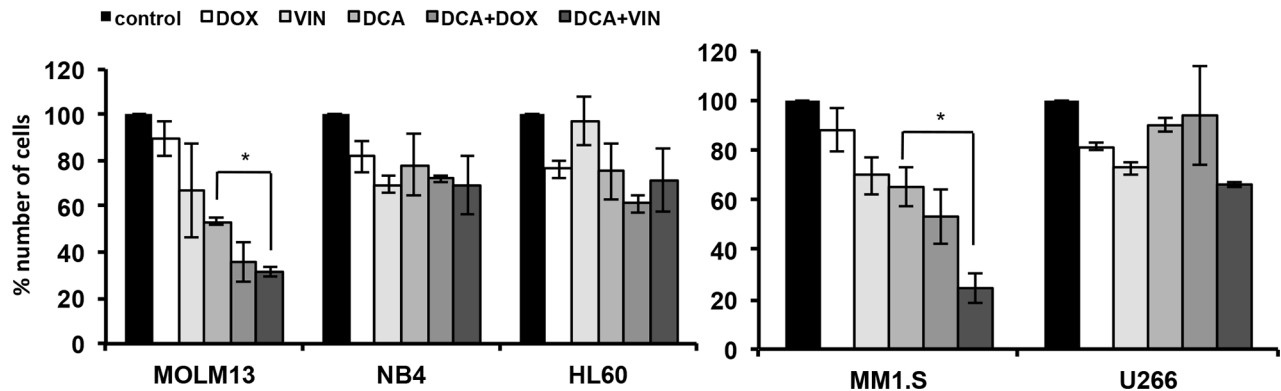**B**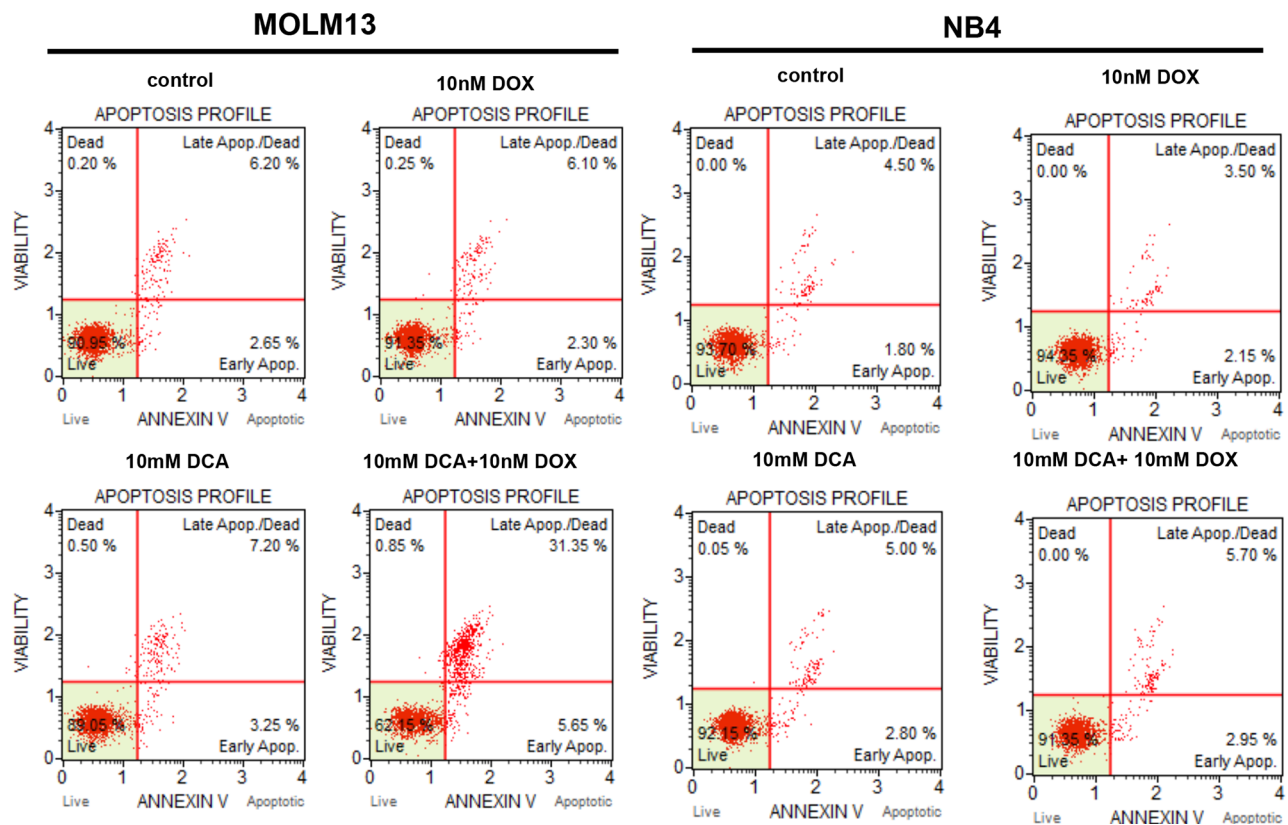

**Supplementary Figure S6: Related with Figure 6.** Additive effect of DCA and doxorubicin or vincristine. **A.** Co-treatment with DCA and doxorubicin (DOX) or vincristine (VIN) at low dose reduced the number of alive cells in wt p53 but not in p53 mutant AML and MM cell lines. Cells were incubated with 10 mM DCA overnight and the next day 10 nM doxorubicin or 10 nM vincristine was added for 24 hours. The number of viable cells was determined by using the Trypan blue exclusion method. Values are the mean  $\pm$  SD of two independent experiments **B.** Co-treatment with DCA and DOX increases the number of apoptotic cells in MOLM13 cells (wt p53) but not NB4 cells (mutant p53). Annexin V assay was performed using the Muse<sup>®</sup> Cell Analyzer.

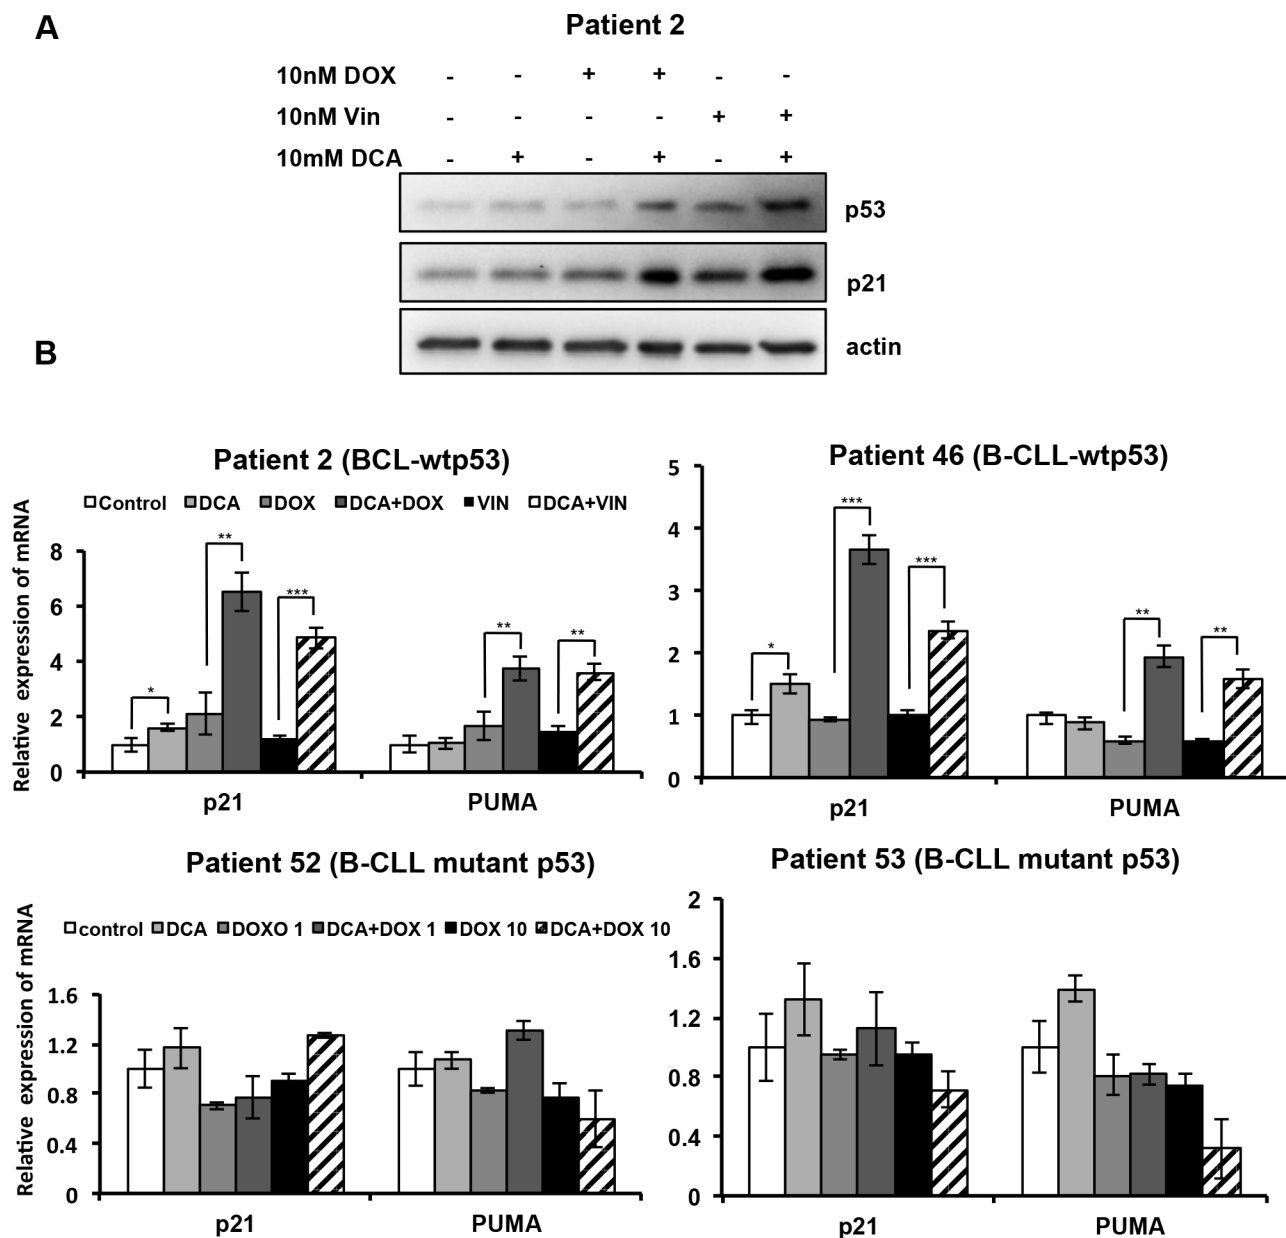

**Supplementary Figure S7: Related with Figure 6.** Synergistic effect of DCA and doxorubicin (DOX) or vincristine (VIN) in primary cells from Patient 2 (BCL). **A.** Co-treatment with DCA and low doses of DOX or VIN. Cells were pre-incubated with 10 mM DCA overnight and the next day 10 nM DOX or 10 nM VIN was added for 24 hours. p53 and p21 expression were revealed by western blotting. **B.** mRNA levels of p21 and PUMA were analysed by RT-qPCR from patient 2 tumor cells. The wt p53 status of this patient was confirmed by sequencing. Values are the mean  $\pm$  SD of one experiment repeated in triplicate \* $p < 0.05$ ; \*\* $p < 0.01$ ; \*\*\* $p < 0.001$ .

**Supplementary Table S1: Cancer type and p53 status of the patients' samples and cell lines used for this study**

| Patient   | Type of cancer | p53 status                 |
|-----------|----------------|----------------------------|
| P2        | BCL            | wt                         |
| P7        | B-CLL          | wt                         |
| P8        | BCL            | wt                         |
| P10       | MDS            | wt                         |
| P13       | MDS            | wt                         |
| P14       | MM             | wt                         |
| P15       | MDS            | wt                         |
| P18       | B-CLL          | wt                         |
| P19       | BCL            | wt                         |
| P21       | B-CLL          | mt several point mutations |
| P22       | MM             | wt                         |
| P25       | B-CLL          | wt                         |
| P28       | MM             | wt                         |
| P33       | B-CLL          | wt                         |
| P36       | MDS            | wt                         |
| P38       | BCL            | wt                         |
| P39 = P52 | B-CLL          | mt P82L                    |
| P40       | B-CLL          | wt                         |
| P43       | B-CLL          | wt                         |
| P44       | MDS            | wt                         |
| P45       | B-CLL          | wt                         |
| P46       | B-CLL          | wt                         |
| P49       | MM             | wt                         |
| P51       | MM             | wt                         |
| P53       | B-CLL          | mt, early stop codon       |
| P54       | B-CLL          | wt                         |
| P55       | MM             | wt                         |
| P56       | MM             | wt                         |
| P67       | B-CLL          | wt                         |
| P69       | BCL            | wt                         |
| P73       | BCL            | wt                         |
| P81       | B-CLL          | wt                         |
| P90       | B-CLL          | mt G360R                   |
| P99       | B-CLL          | wt                         |
| P1A       | B-CLL          | wt                         |
| P2A       | B-CLL          | wt                         |

(Continued)

| Cell line  | Type of cancer    | p53 status |
|------------|-------------------|------------|
| MOLM13     | AML               | wt         |
| NB4        | AML               | mt R248Q   |
| HL60       | AML               | null       |
| MM1.S      | MM                | wt         |
| U266       | MM                | mt A161T   |
| HCT116 +/+ | Colorectal cancer | wt         |
| HCT116 -/- | Colorectal cancer | null       |
